# Supplementary figures and images for: Correlation between Quality and Geographical Origins of Poria cocos Revealed by Qualitative Fingerprint Profiling and Quantitative Determination of Triterpenoid Acids
Source: MDPI journal article supplement (doi:10.3390/molecules23092200), 2018-08-31

**A**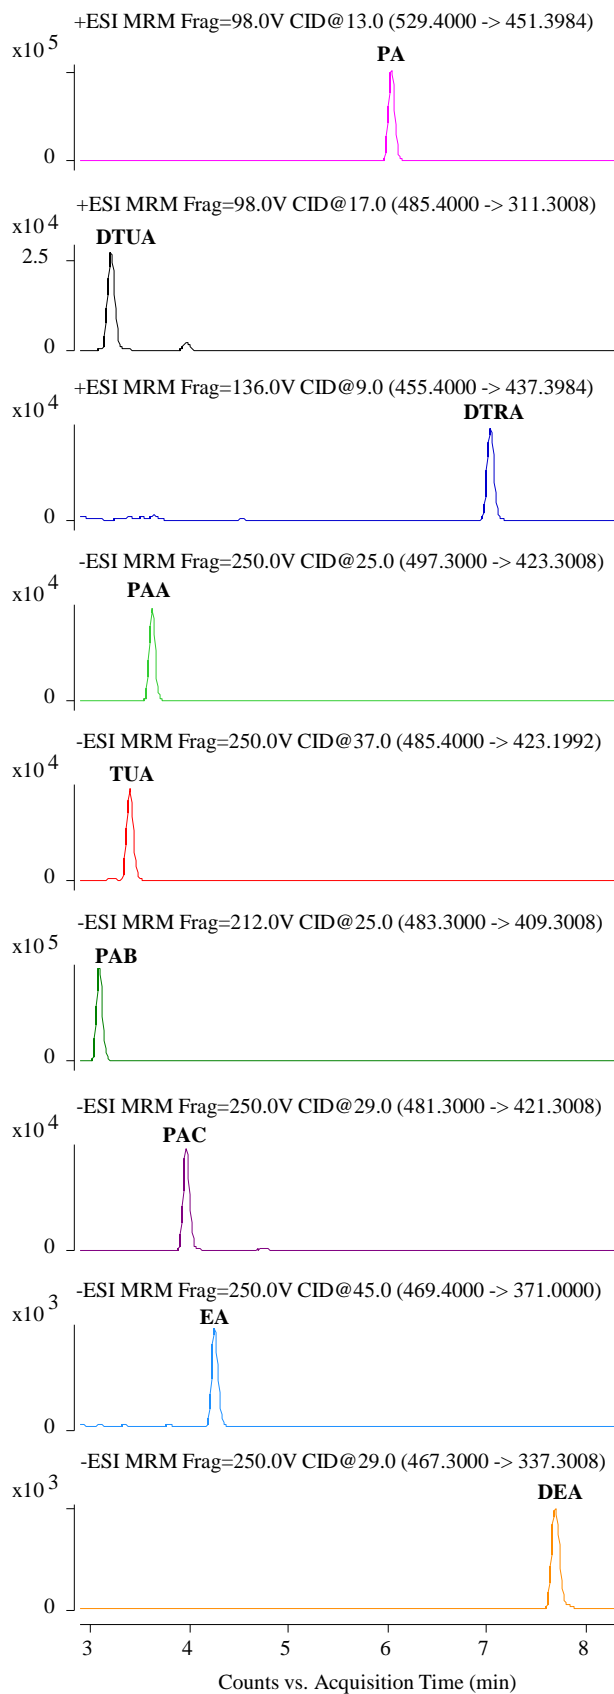**B**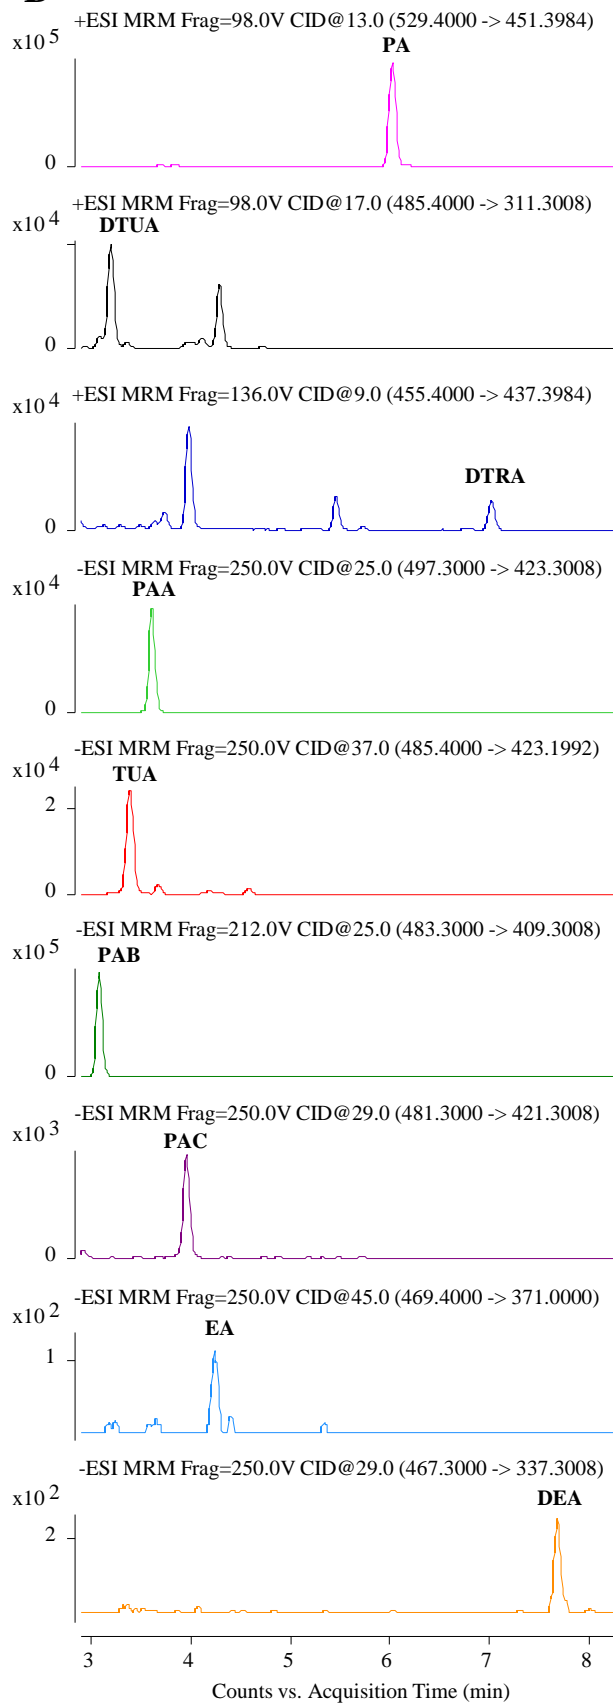

Supplement: s1 [file s1]
